# Supplementary material
Source: ML conference proceedings conference paper supplement (https://proceedings.mlr.press/v139/li21u.html)
Supplement: Supplementary file 3 [file li21u-supp.zip]

Archive with 22 entries (17 files):
- supp/
- supp/.DS_Store
- __MACOSX/
- __MACOSX/supp/
- __MACOSX/supp/._.DS_Store
- supp/code/
- supp/code/plot_m.py
- __MACOSX/supp/code/
- __MACOSX/supp/code/._plot_m.py
- supp/code/plot_p.py
- __MACOSX/supp/code/._plot_p.py
- supp/code/one-shot.py
- supp/code/pm.py
- __MACOSX/supp/code/._pm.py
- supp/code/plot_decay.py
- __MACOSX/supp/code/._plot_decay.py
- supp/code/plot_sin.py
- __MACOSX/supp/code/._plot_sin.py
- supp/code/eta.py
- __MACOSX/supp/code/._eta.py
- supp/supplementary.pdf
- __MACOSX/supp/._supplementary.pdf
